# Supplementary material
Source: publisher site journal article supplement (https://www.dovepress.com/article/424024)
Supplement: Supplementary file 1 [file get_supplementary_file.php]

## **Supplementary Table 1. Full List of Formatted Search Terms**

Embase Classic+Embase search terms <1947 to 2021 November 12>

|    |                                                                                                                                                                                                             |         |
|----|-------------------------------------------------------------------------------------------------------------------------------------------------------------------------------------------------------------|---------|
| 1  | Chronic illness*.mp.                                                                                                                                                                                        | 25718   |
| 2  | chronic condition*.mp.                                                                                                                                                                                      | 33249   |
| 3  | long-term condition*.mp.                                                                                                                                                                                    | 2940    |
| 4  | long-term health condition*.mp.                                                                                                                                                                             | 352     |
| 5  | long-term illness*.mp.                                                                                                                                                                                      | 983     |
| 6  | Chronic disease*.mp.                                                                                                                                                                                        | 269041  |
| 7  | Chronic health condition*.mp.                                                                                                                                                                               | 4176    |
| 8  | Long-lasting disease*.mp.                                                                                                                                                                                   | 388     |
| 9  | long-lasting condition*.mp.                                                                                                                                                                                 | 69      |
| 10 | Inflammatory Bowel Disease.mp.                                                                                                                                                                              | 95288   |
| 11 | exp ulcerative colitis/ or exp colitis/ or exp Crohn disease/ or exp inflammatory bowel disease/                                                                                                            | 255342  |
| 12 | Ulcerative Colitis.mp.                                                                                                                                                                                      | 94775   |
| 13 | UC.mp.                                                                                                                                                                                                      | 49264   |
| 14 | Crohns Disease.mp.                                                                                                                                                                                          | 80934   |
| 15 | CD.mp.                                                                                                                                                                                                      | 214417  |
| 16 | rheumatoid arthritis.mp.                                                                                                                                                                                    | 257628  |
| 17 | MS.mp.                                                                                                                                                                                                      | 523172  |
| 18 | multiple sclerosis.mp.                                                                                                                                                                                      | 161082  |
| 19 | (Intervention* or RCT or Randomised Control Trial* or Clinical Trial* or Online intervention* or Web-based intervention* or digital intervention* or digital health intervention* or app intervention*).mp. | 3341829 |

|    |                                                                                                            |
|----|------------------------------------------------------------------------------------------------------------|
| 20 | 1 or 2 or 3 or 4 or 5 or 6 or 7 or 8 or 9 or 10 or 11 or 12 or 13 or 14 or 15 or 16 or 17 or 18<br>1587598 |
| 21 | Adherence.mp. 235416                                                                                       |
| 22 | medication adherence.mp. 21202                                                                             |
| 23 | patient compliance.mp. 149479                                                                              |
| 24 | adher*.mp. 341384                                                                                          |
| 25 | complian*.mp. 384614                                                                                       |
| 26 | persit*.mp. 210                                                                                            |
| 27 | discount*.mp. 22340                                                                                        |
| 28 | non-complian*.mp. 14761                                                                                    |
| 29 | concordan*.mp. 115308                                                                                      |
| 30 | non-concordan*.mp. 597                                                                                     |
| 31 | non-persisten*.mp. 1656                                                                                    |
| 32 | Non-adheren*.mp. 19337                                                                                     |
| 33 | medication non adherence.mp. 1673                                                                          |
| 34 | medication non compliance.mp.307                                                                           |
| 35 | Intervention*.mp. 1669396                                                                                  |
| 36 | RCT.mp. 46549                                                                                              |
| 37 | Randomised Control Trial*.mp. 3658                                                                         |
| 38 | Clinical Trial*.mp. 1869027                                                                                |
| 39 | Online intervention*.mp. 1388                                                                              |
| 40 | Web-based intervention*.mp. 2563                                                                           |
| 41 | digital intervention*.mp. 749                                                                              |
| 42 | digital health intervention*.mp. 413                                                                       |
| 43 | app intervention*.mp. 184                                                                                  |

|    |                                                                                  |         |
|----|----------------------------------------------------------------------------------|---------|
| 44 | 21 or 22 or 23 or 24 or 25 or 26 or 27 or 28 or 29 or 30 or 31 or 32 or 33 or 34 | 780868  |
| 45 | 35 or 36 or 37 or 38 or 39 or 40 or 41 or 42 or 43                               | 3341829 |
| 46 | 20 and 44 and 45                                                                 | 12699   |
| 47 | limit 46 to (english and (adult <18 to 64 years> or aged <65+ years>))           | 6179    |

**Supplementary Table 2. Categories of Interventions**

|                                                    | <b><u>Approach Type</u></b>                                                                                                                                              |                                                                                                                                                                                                  |                                                                                                                                                                       |                                                                                                                                                                                                                      |                                                                       |
|----------------------------------------------------|--------------------------------------------------------------------------------------------------------------------------------------------------------------------------|--------------------------------------------------------------------------------------------------------------------------------------------------------------------------------------------------|-----------------------------------------------------------------------------------------------------------------------------------------------------------------------|----------------------------------------------------------------------------------------------------------------------------------------------------------------------------------------------------------------------|-----------------------------------------------------------------------|
|                                                    | <b>Technology Assisted</b>                                                                                                                                               | <b>Educational</b>                                                                                                                                                                               | <b>Monitoring</b>                                                                                                                                                     | <b>Psychological/ Behaviour Change</b>                                                                                                                                                                               | <b>Tools</b>                                                          |
| <b><u>Examples</u></b>                             | <i>Text message reminders,<br/><br/>Web-based interventions, Telephone.</i>                                                                                              | <i>E-learning; Teaching sessions.</i>                                                                                                                                                            | <i>Electronic pill bottle/s &amp;/or caps; Pill counts; Telephone check-ups.</i>                                                                                      | <i>Cognitive Behavioural Therapy; Motivational Interviewing; Counselling.</i>                                                                                                                                        | <i>Pill box organiser; Diaries; Information pack, Advice sheet.</i>   |
| <b><u>Description</u></b>                          | <i>Electronic system is used to support adherence.</i>                                                                                                                   | <i>Education provided to participants in various formats.</i>                                                                                                                                    | <i>Frequent checking of participants' adherence behaviour/s.</i>                                                                                                      | <i>Psychological approach based upon a theoretical framework.</i>                                                                                                                                                    | <i>Physical items offered to participants and used independently.</i> |
| <b><u>Predominant Intervention Component/s</u></b> | Chapman et al <sup>4</sup> , 2020<br><br>Cross et al <sup>47</sup> , 2012<br><br><b>De Jong et al<sup>48</sup>, 2017</b><br><br><b>Del Hoyo et al<sup>49</sup>, 2018</b> | Chapman et al <sup>4</sup> , 2020<br><br><b>El Miedany et al<sup>50</sup>, 2012</b><br><br><b>El Miedany, Gaafary &amp; Palmer<sup>51</sup>, 2012</b><br><br>Nikolaus et al <sup>57</sup> , 2014 | Cross et al <sup>47</sup> , 2012<br><br><b>Del Hoyo et al<sup>49</sup>, 2018</b><br><br>Hebing et al <sup>52</sup> , 2022<br><br>Landtblom et al <sup>36</sup> , 2012 | <b>Asgari et al<sup>46</sup>, 2021</b><br><br>Cross et al <sup>47</sup> , 2021<br><br>Chapman et al <sup>4</sup> , 2020<br><br><b>El Miedany et al<sup>50</sup>, 2012</b><br><br>Ferguson et al <sup>45</sup> , 2014 | Cross et al <sup>47</sup> , 2012                                      |

|                                                  |                                                                                                                                                                                                                                                                                                                                                                           |                                                                                                                                                                                                                                                                                                              |                                                                                                                                                                          |                                                                                                                                                                                                                                                                                                                                                                                           |                                                                                                                                                                                                                                       |
|--------------------------------------------------|---------------------------------------------------------------------------------------------------------------------------------------------------------------------------------------------------------------------------------------------------------------------------------------------------------------------------------------------------------------------------|--------------------------------------------------------------------------------------------------------------------------------------------------------------------------------------------------------------------------------------------------------------------------------------------------------------|--------------------------------------------------------------------------------------------------------------------------------------------------------------------------|-------------------------------------------------------------------------------------------------------------------------------------------------------------------------------------------------------------------------------------------------------------------------------------------------------------------------------------------------------------------------------------------|---------------------------------------------------------------------------------------------------------------------------------------------------------------------------------------------------------------------------------------|
|                                                  | <p><b>El Miedany, Gaafary &amp; Palmer<sup>51</sup>, 2012</b></p> <p>Landtblom et al<sup>36</sup>, 2012</p> <p>Linn et al<sup>54</sup>, 2018</p> <p><b>Mary et al<sup>55</sup>, 2019</b></p> <p><b>Rice et al<sup>58</sup>, 2021</b></p> <p>Settle et al<sup>59</sup>, 2016</p> <p><b>Song et al<sup>60</sup>, 2020</b></p> <p><b>Turner et al<sup>63</sup>, 2014</b></p> | <p><b>Song et al<sup>60</sup>, 2020</b></p> <p>Taibanguay et al<sup>61</sup>, 2019</p> <p>Tan et al<sup>62</sup>, 2021</p> <p>Unk et al<sup>64</sup>, 2014</p>                                                                                                                                               | <p>Matteson-Kome et al<sup>56</sup>, 2014</p> <p><b>Rice et al<sup>58</sup>, 2021</b></p> <p>Settle et al<sup>59</sup>, 2016</p> <p>van Heuckelum<sup>65</sup>, 2021</p> | <p>Hebing et al<sup>52</sup>, 2022</p> <p>Keefer et al<sup>53</sup>, 2012</p> <p>Linn et al<sup>54</sup>, 2018</p> <p><b>Mary et al<sup>55</sup>, 2019</b></p> <p>Matteson-Kome et al<sup>56</sup>, 2014</p> <p><b>Song et al<sup>60</sup>, 2020</b></p> <p>Taibanguay et al<sup>61</sup>, 2019</p> <p><b>Turner et al<sup>63</sup>, 2014</b></p> <p>Zwikker et al<sup>66</sup>, 2014</p> |                                                                                                                                                                                                                                       |
| <p><u>Secondary Intervention Component/s</u></p> | NIL                                                                                                                                                                                                                                                                                                                                                                       | <p><b>Asgari et al<sup>46</sup>, 2021</b></p> <p>Cross et al<sup>47</sup>, 2012.</p> <p><b>De Jong et al<sup>48</sup>, 2017</b></p> <p><b>Del Hoyo et al<sup>49</sup>, 2018</b></p> <p>Landtblom et al<sup>36</sup>, 2019</p> <p>Settle et al<sup>59</sup>, 2016</p> <p>Zwikker et al<sup>66</sup>, 2014</p> | <p><b>De Jong et al<sup>48</sup>, 2017</b></p> <p><b>Turner et al<sup>63</sup>, 2014</b></p>                                                                             | van Heuckelum et al <sup>65</sup> ,2021                                                                                                                                                                                                                                                                                                                                                   | <p><b>Asgari et al<sup>46</sup>, 2020</b></p> <p><b>Del Hoyo et al<sup>49</sup>, 2018</b></p> <p><b>El Miedany et al<sup>50</sup>, 2012</b></p> <p><b>Mary et al<sup>55</sup>, 2019</b></p> <p>Landtblom et al<sup>36</sup>, 2012</p> |

*Note: Studies in **Bold** text were found to have a significantly effective adherence intervention at completion when compared to controls*
